# Supplementary material
Source: publisher figshare collection journal article supplement (https://tandf.figshare.com/ndownloader/files/15562811)
Supplement: Supplementary file 1 [file 15562811]

**Supplementary material**

**
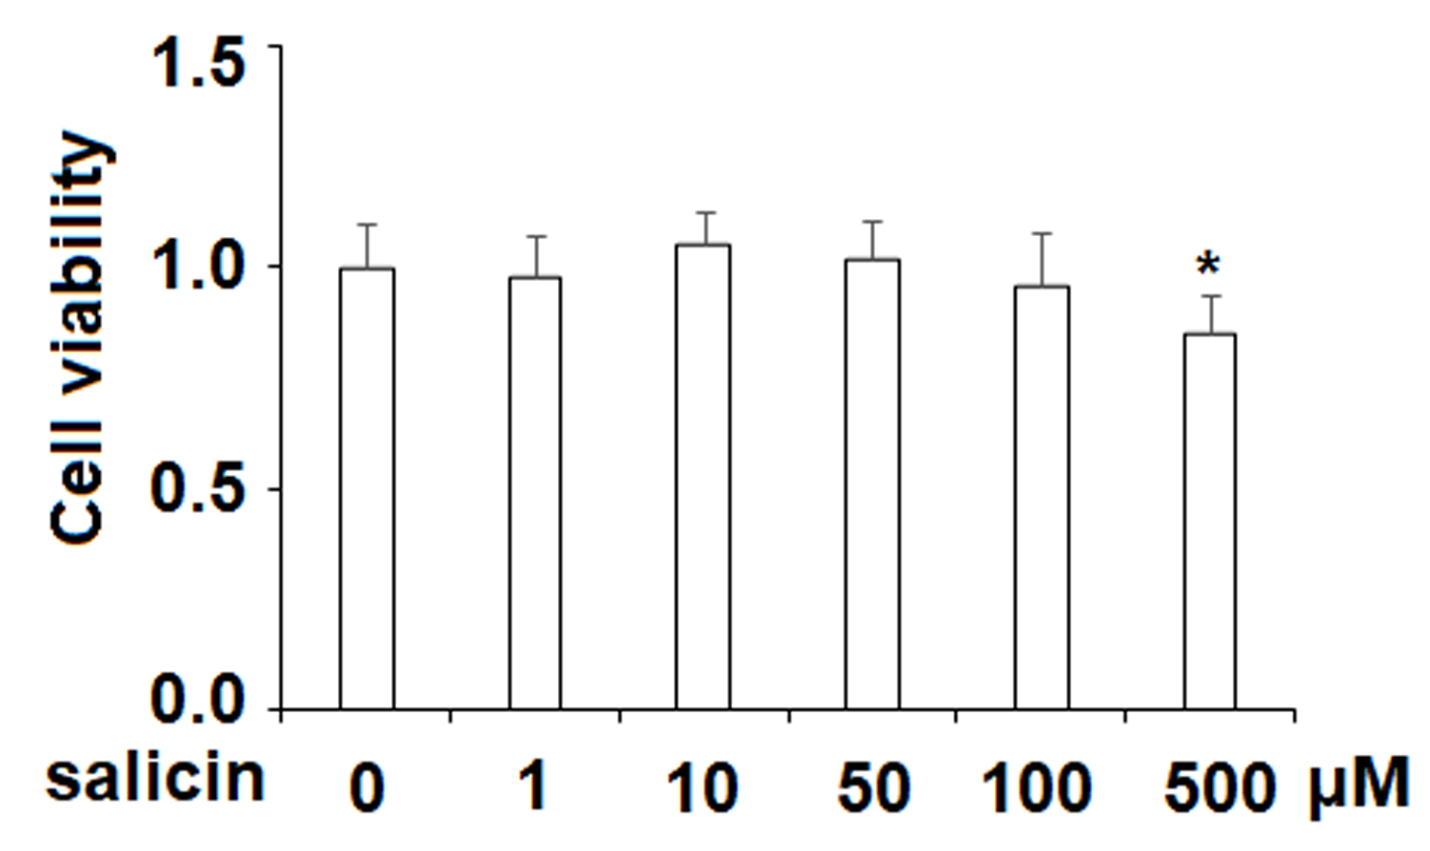
**

**Supplementary Figure 1**. The effects of salicin on the cell viability of HUVECs. HUVECs were incubated with 1, 10, 50, 100, 500 μM salicin for 48 h. Cell viability of HUVECs was measured by MTT assay (*, P<0.01 vs. vehicle control).

**
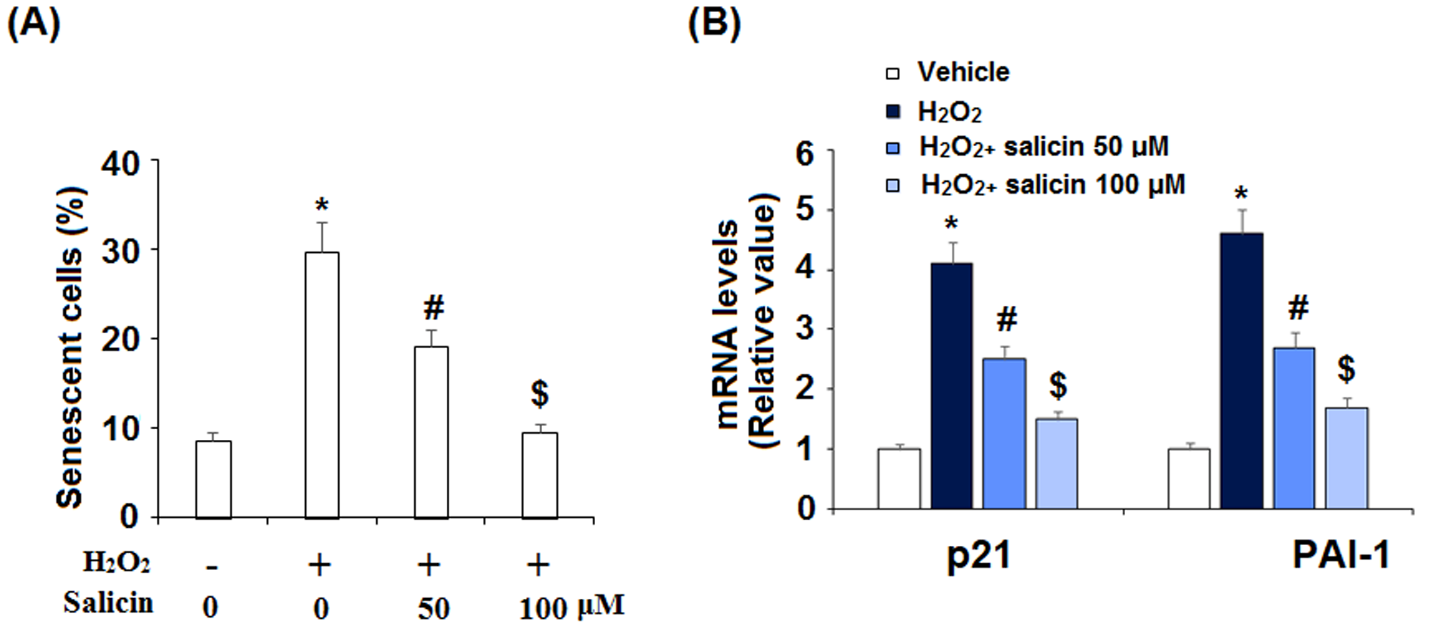
**

**Supplementary Figure 2**. Salicin prevented H2O2-induced cellular senescence. HUVECs were stimulated with H2O2 (100 μM) with or without salicin (50, 100 μM) for 24 h. (A). Percentages of SA-β-gal-positive cells; (B). mRNA of p21 and PAI-1 (*, #, $, P<0.01 vs. previous group).
